# Supplementary material
Source: PubMed Central journal article supplement (PMC4636918)
Supplement: NIHMS730375-supplement-1.pdf [file NIHMS730375-supplement-1.pdf]

# Mass spectrometric *N*-glycan analysis of haptoglobin from patient serum samples using a 96-well plate format

*Jianhui Zhu<sup>1</sup>, Jing Wu<sup>1</sup>, Haidi Yin<sup>1</sup>, Jorge Marrero<sup>2</sup>, and David M. Lubman<sup>1\*</sup>*

<sup>1</sup>Department of Surgery, University of Michigan Medical Center, Ann Arbor, MI 48109

<sup>2</sup>UT Southwestern Medical Center, Department of Internal Medicine, Dallas, TX 75390

## Supporting Information

### Table of Contents

**Figure S1.** HPLC chromatogram of a human haptoglobin standard

**Figure S2.** HPLC chromatogram of haptoglobin enrichment from patient serum and 1D gel analysis

**Figure S3.** Comparison between HPLC platform versus IP method for serum Hp enrichment

**Figure S4.** MALDI-QIT-TOF MS/MS spectra for glycan composition assignment

**Figure S5.** MALDI MS spectra of *N*-glycans from sequential aliquots of a human haptoglobin standard

**Figure S6.** MALDI MS analysis of four replicates of haptoglobin derived from an HCC patient serum

**Table S1.** The binding efficiency of the anti-Hp HPLC column measured by a human Hp standard

**Table S2.** Eight *N*-glycans identified in serum haptoglobin after desialylation and permethylation

**Table S3.** The bifucosylation and core-fucosylation degrees of Hp in individual serum samples

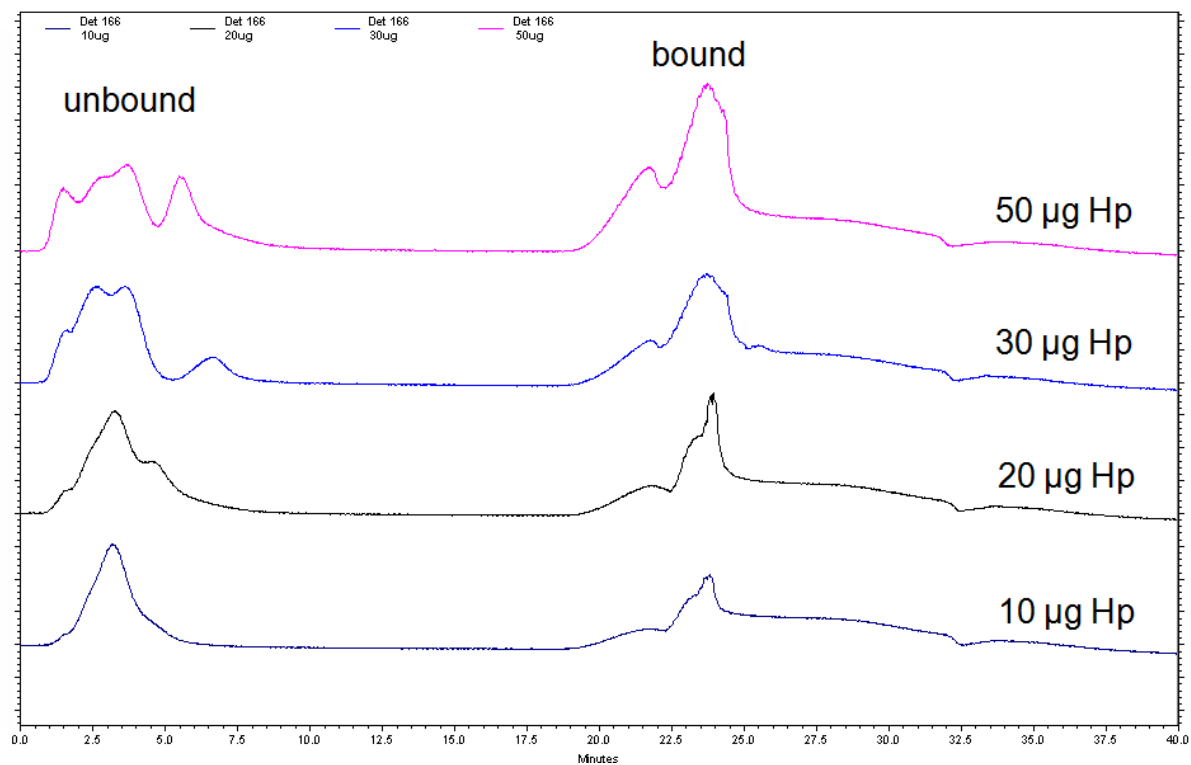

**Figure S1.** The chromatogram shows the binding efficiency of the antibody-immobilized HPLC column which was measured by a human haptoglobin standard with different loading amounts, i.e. 10, 20, 30, and 50 µg, respectively.

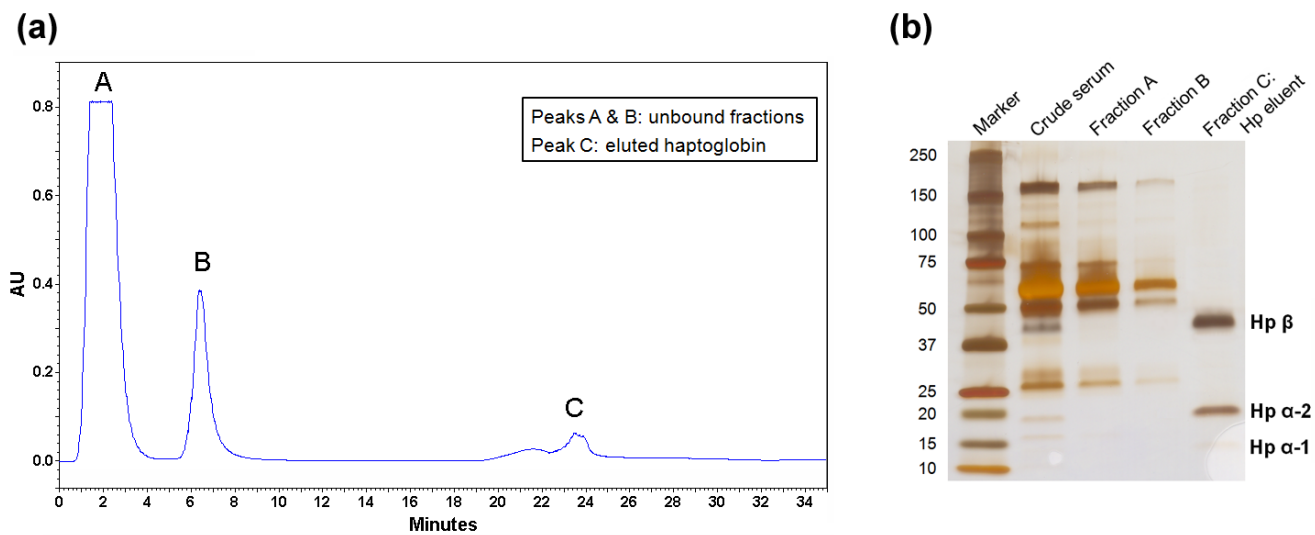

**Figure S2.** (a) A representative chromatogram of haptoglobin enrichment from patient serum using an antibody-immobilized HPLC platform. (b) 1D gel analysis of unbound fractions A and B, and the eluted fraction C after HPLC enrichment. 1/400 of fraction A and B, and 1/10 of haptoglobin eluent, as well as crude serum (0.1  $\mu$ L) were run on a 4–20% SDS-PAGE gel and visualized by silver staining using ProteoSilver™ Plus Silver Stain Kit (Sigma).

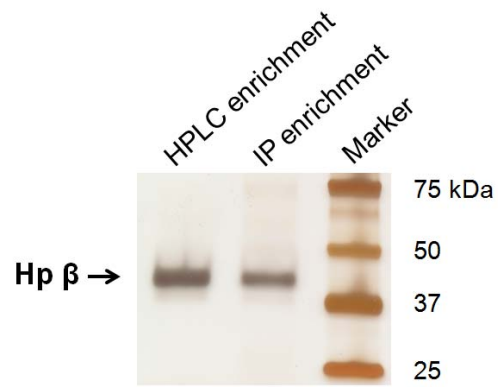

**Figure S3.** Comparison of the yield of haptoglobin enriched from patient serum using the antibody-immobilized HPLC platform versus the conventional immunoprecipitation method. One-tenth of the haptoglobin eluent from the HPLC column and immunoprecipitation, respectively, were run on a 4–20% SDS-PAGE gel and visualized by silver staining.

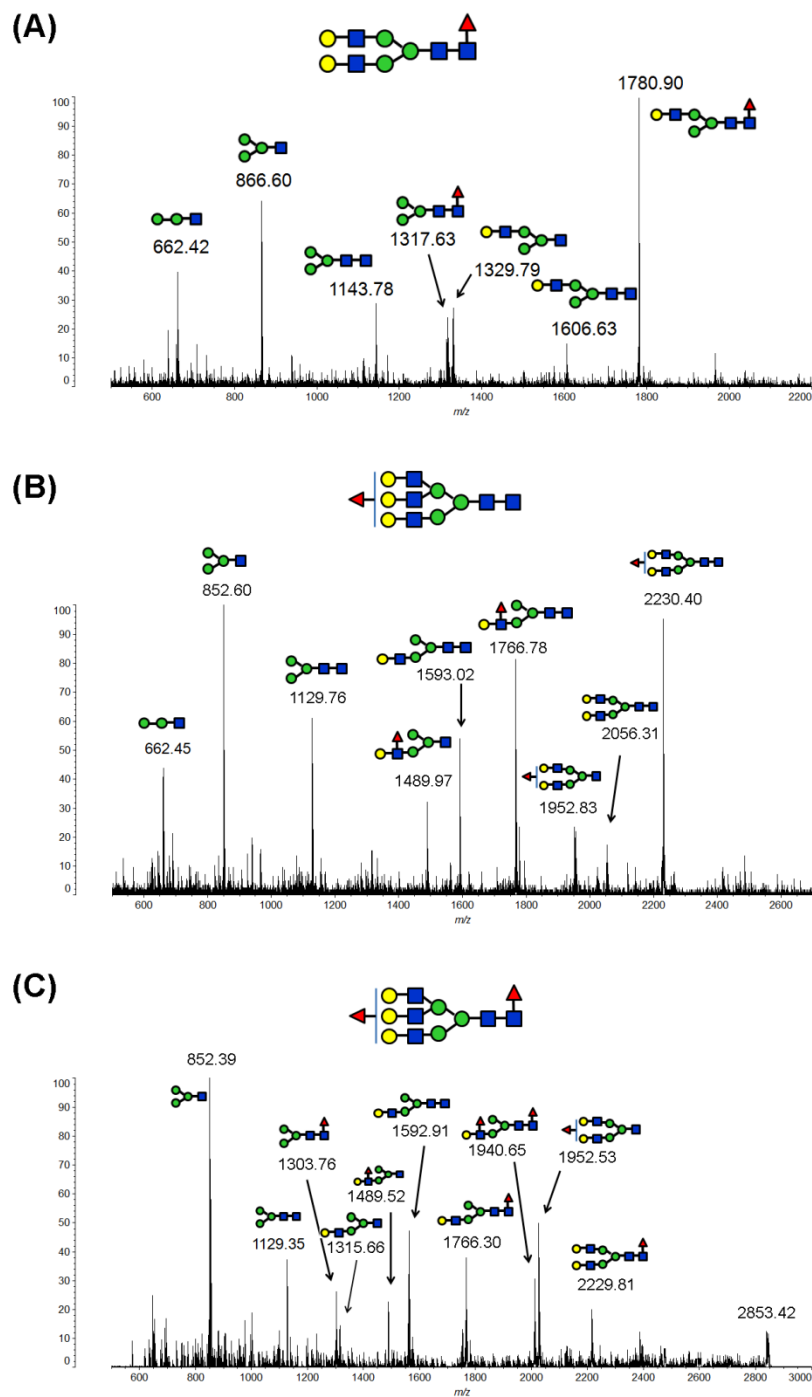

**Figure S4.** Representative MALDI-QIT-TOF MS/MS spectra of glycans at (A)  $m/z$  2244.13, (B)  $m/z$  2693.40, and (C)  $m/z$  2867.48 for glycan composition and core/antennary fucosylation assignment. Potential structures of fragment ions are labeled. At low energy CID, the predominant fragments are  $y$ -ions resulting from the cleavage of labile GlcNAc-Hex glycosidic bond; therefore, the oligosaccharide composition can be inferred from mass differences of fragment ions. (A) The fucosylated biantennary glycan ( $m/z$  2244.13) is confirmed as core fucosylated because of a diagnostic fragment at 1317.63

which corresponds to a fucosylated pentasaccharide core. This conclusion is also supported by an ion at 1329.79 resulting from loss of core Fuc-GlcNAc. (B) The fucosylated tri-antennary glycan ( $m/z$  2693.40) is confirmed as antennary fucosylated. A diagnostic peak at  $m/z$  1952.83 is the cleavage product of peak at 2230.40 after loss of core GlcNAc, indicating that there is no core fucose attached originally. (C) The bifucosylated triantennary glycan ( $m/z$  2867.48) is determined as a triantennary structure with both core and antennary fucosylation. The fragment ion at  $m/z$  1940.65 is the product after loss of two nonreducing terminal Gal-GlcNAc residues, with two attached fucose residues. Core fucosylation is confirmed by the presence of a fragment ion at  $m/z$  1303.76 corresponding to a fucosylated pentasaccharide core structure. A peak at  $m/z$  1489.52 resulting from loss of core Fuc-GlcNAc unambiguously indicates antennary fucosylation.

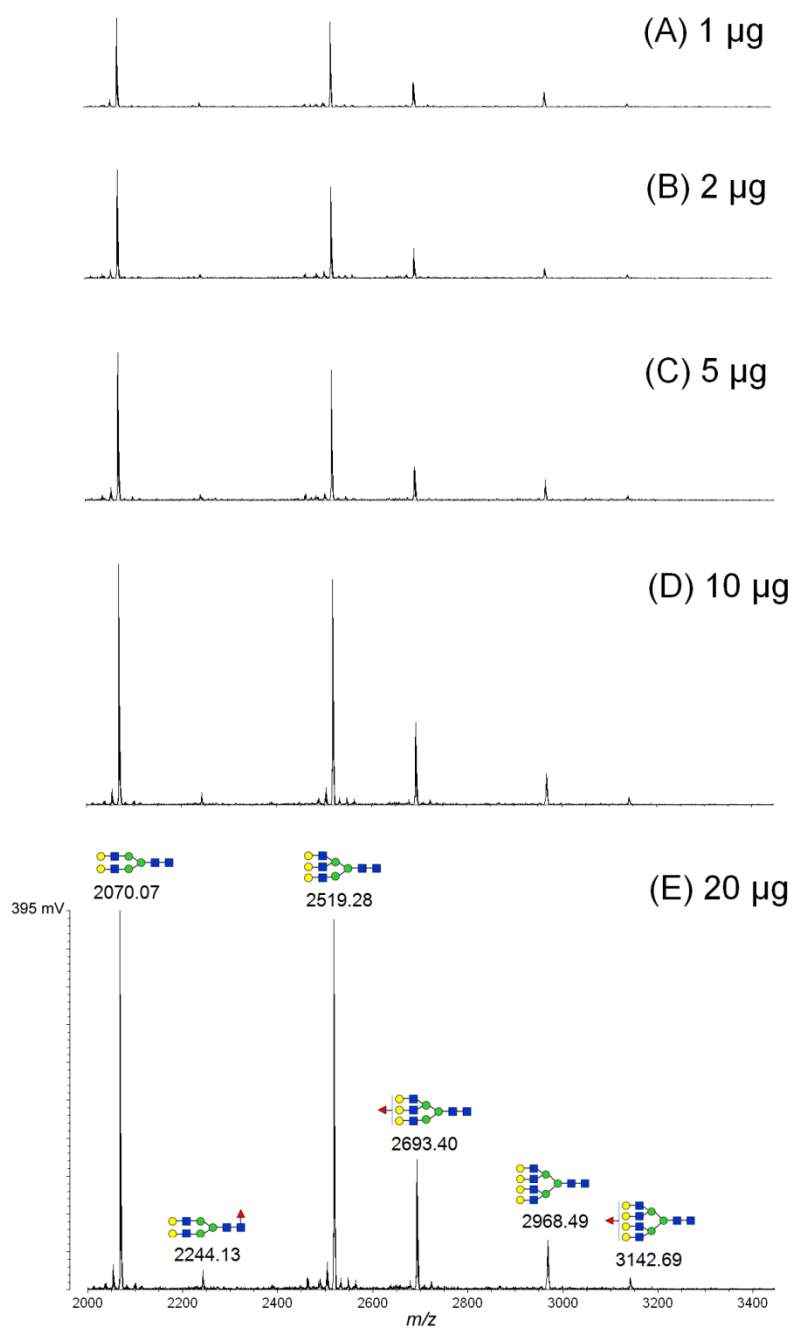

**Figure S5.** MALDI-QIT-TOF MS spectra of *N*-glycans from a human haptoglobin standard processed on the 96-well plate format in sequential aliquots of 1, 2, 5, 10, and 20  $\mu\text{g}$ , respectively.

(A) Replicate 1

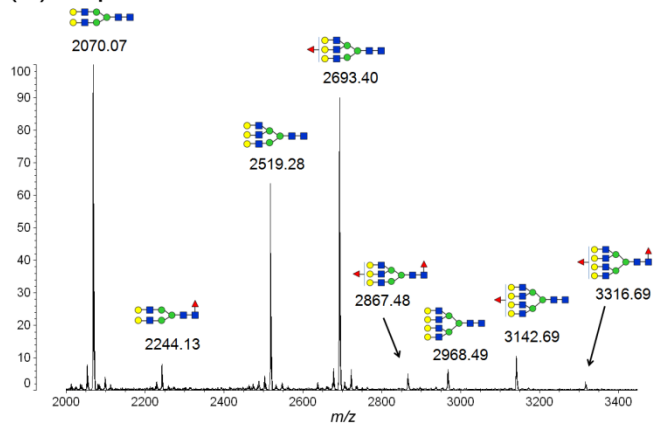

(B) Replicate 2

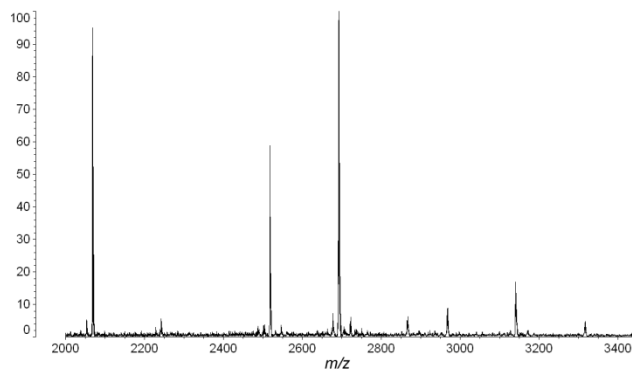

(C) Replicate 3

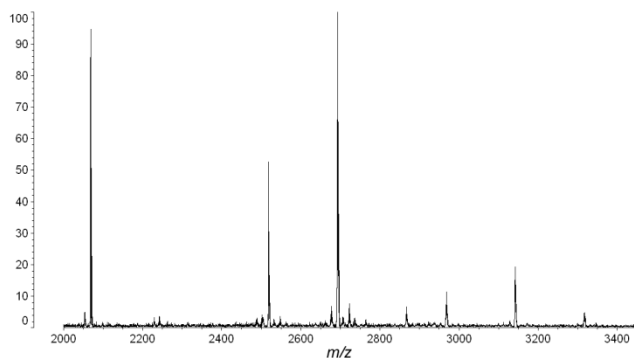

(D) Replicate 4

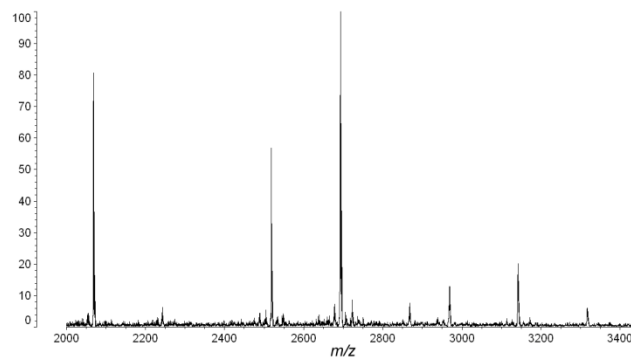

**Figure S6.** MALDI-QIT-TOF MS analysis of four replicates of haptoglobin derived from 10  $\mu$ L of serum of an ALC-related HCC patient followed by *N*-glycan processing on the 96-well plate format.



**Table S1.** The binding efficiency of the anti-Hp HPLC column measured by a human haptoglobin standard, which was calculated by the ratio of peak area of the bound fraction to the sum of peak areas of bound and unbound fractions.

| Loading amount (Hp) | Peak area of unbound fraction | Peak area of bound fraction | Binding efficiency |
|---------------------|-------------------------------|-----------------------------|--------------------|
| 10 $\mu$ g          | 3601794                       | 6995444                     | 66.0%              |
| 20 $\mu$ g          | 5201635                       | 8175367                     | 61.1%              |
| 30 $\mu$ g          | 5701265                       | 9495381                     | 62.5%              |
| 50 $\mu$ g          | 6980786                       | 12480825                    | 64.1%              |

**Table S2.** Eight *N*-glycans identified in serum haptoglobin after desialylation and permethylation.

| Peak No. | Observed <i>m/z</i> | Calculated <i>m/z</i> | Glycan structure                                                                    |
|----------|---------------------|-----------------------|-------------------------------------------------------------------------------------|
| 1        | 2070.07             | 2070.03               | 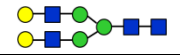 |
| 2        | 2244.13             | 2244.12               |  |
| 3        | 2519.28             | 2519.26               |  |
| 4        | 2693.40             | 2693.35               |  |
| 5        | 2867.48             | 2867.44               |  |
| 6        | 2968.49             | 2968.49               |  |
| 7        | 3142.69             | 3142.58               |  |
| 8        | 3316.69             | 3316.67               |  |

**Table S3.** The bifucosylation and core-fucosylation degrees of haptoglobin enriched from individual serum samples including 15 HCC and 15 cirrhosis cases.

| Sample No.    | Bifucosylation degree |                   | Core-fucosylation degree |                   |
|---------------|-----------------------|-------------------|--------------------------|-------------------|
|               | HCC                   | Cirrhosis         | HCC                      | Cirrhosis         |
| 1             | 0.0989                | 0.0268            | 0.1782                   | 0.0986            |
| 2             | 0.0871                | 0.0252            | 0.1685                   | 0.0962            |
| 3             | 0.1060                | 0.0389            | 0.1811                   | 0.1582            |
| 4             | 0.0554                | 0.0159            | 0.1217                   | 0.0793            |
| 5             | 0.0770                | 0.0139            | 0.1563                   | 0.0837            |
| 6             | 0.0964                | 0.0233            | 0.1149                   | 0.1830            |
| 7             | 0.0982                | 0.0384            | 0.1628                   | 0.1307            |
| 8             | 0.1174                | 0.0317            | 0.2535                   | 0.1278            |
| 9             | 0.0755                | 0.0384            | 0.1472                   | 0.1307            |
| 10            | 0.0649                | 0.0069            | 0.1379                   | 0.0944            |
| 11            | 0.0589                | 0.0329            | 0.1207                   | 0.1493            |
| 12            | 0.0688                | 0.0281            | 0.1378                   | 0.1098            |
| 13            | 0.0634                | 0.0287            | 0.1318                   | 0.1188            |
| 14            | 0.0807                | 0.0430            | 0.1565                   | 0.1603            |
| 15            | 0.0729                | 0.0344            | 0.1351                   | 0.1653            |
| Mean $\pm$ SD | 0.081 $\pm$ 0.018     | 0.028 $\pm$ 0.010 | 0.15 $\pm$ 0.0089        | 0.13 $\pm$ 0.0083 |
